# Supplementary material for: Exploring the concept of non-violent resistance amongst healthcare workers
Source: PubMed Central journal article supplement (PMC9902996; doi:10.1177/09697330221122904), 2022-10-06
Supplement: sj-pdf-1-nej-10.1177_09697330221122904.pdf [file sj-pdf-1-nej-10.1177_09697330221122904.pdf]

## Supplementary material for reviewers only – survey – adapted from Qualtrics

---

What do you think is meant by non-violent resistance/action?

---

**For the remainder of this survey, when we refer to non-violent resistance/action we mean it as an umbrella term to refer to a range of political actions. Such action could be organised and public or individual and carried out in private. Non-violent resistance can undertaken in response to a range of issues and can also be legal or illegal. Such action could include “protests”, “marches”, “lobbying”, “flyering/leafleting”, “whistleblowing”, “civil disobedience” and even “everyday acts” performed in your day to day activities or in your role as a healthcare worker.**

---

Does the involvement of healthcare workers in non-violent action make the action distinct or different in any way?

| Yes                   | No                    | Unsure                |
|-----------------------|-----------------------|-----------------------|
| <input type="radio"/> | <input type="radio"/> | <input type="radio"/> |

Please elaborate **(THIS QUESTION WILL BE OPTIONAL)**

---

Do you have any further thoughts or concerns about non-violent resistance that you would like to

leave here? (THIS QUESTION WILL BE OPTIONAL)

---

## Demographic information

We would like to know a little more about you, however all of the following questions are optional.

Are you retired?

|                       |                       |
|-----------------------|-----------------------|
| Yes                   | No                    |
| <input type="radio"/> | <input type="radio"/> |

Have you ever engaged in non-violent resistance? (for these purposes we mean all forms of action from civil disobedience, marches, lobbying, flyering/leafleting etc)

|                       |                       |
|-----------------------|-----------------------|
| Yes                   | No                    |
| <input type="radio"/> | <input type="radio"/> |

If so, how often do you generally engage in such action?

|                       |                       |                       |                       |                         |                          |
|-----------------------|-----------------------|-----------------------|-----------------------|-------------------------|--------------------------|
| Less than once a year | About once a year     | A few times a year    | About every month     | A few times every month | About every week or more |
| <input type="radio"/> | <input type="radio"/> | <input type="radio"/> | <input type="radio"/> | <input type="radio"/>   | <input type="radio"/>    |

What type of non-violent resistance/action have you engaged in (please tick all that apply)?

|                                  |                       |
|----------------------------------|-----------------------|
| 1. Civil disobedience            | <input type="radio"/> |
| 2. Strike action                 | <input type="radio"/> |
| 3. Marches                       | <input type="radio"/> |
| 4. Everyday acts at home/at work | <input type="radio"/> |
| 5. Whistleblowing                | <input type="radio"/> |
| 6. Lobbying                      | <input type="radio"/> |
| 7. Vigils                        | <input type="radio"/> |
| 8. Sit-ins                       | <input type="radio"/> |
| 9. Online activism               | <input type="radio"/> |
| 10. Flyering/leafleting          | <input type="radio"/> |
| Other                            | <input type="radio"/> |

If other, please specify

|  |
|--|
|  |
|--|

What is your age?

|                       |                       |                       |                       |                       |                       |
|-----------------------|-----------------------|-----------------------|-----------------------|-----------------------|-----------------------|
| 18-24                 | 25-34                 | 35-44                 | 45-54                 | 55-64                 | 65+                   |
| <input type="radio"/> | <input type="radio"/> | <input type="radio"/> | <input type="radio"/> | <input type="radio"/> | <input type="radio"/> |

Gender

|                       |                       |                       |
|-----------------------|-----------------------|-----------------------|
| Male                  | Female                | Other                 |
| <input type="radio"/> | <input type="radio"/> | <input type="radio"/> |

What best describes your profession now or prior to your retirement?

|                        |                       |
|------------------------|-----------------------|
| Doctor                 | <input type="radio"/> |
| Nurse                  | <input type="radio"/> |
| Midwife                | <input type="radio"/> |
| Occupational therapist | <input type="radio"/> |
| Psychologist           | <input type="radio"/> |
| Paramedic              | <input type="radio"/> |
| Physiotherapist        | <input type="radio"/> |
| Radiographer           | <input type="radio"/> |
| Academic               | <input type="radio"/> |
| Other                  | <input type="radio"/> |

If other, please specify

In your role in healthcare what level of seniority do you hold, now or prior to your retirement?

|                       |                       |                       |
|-----------------------|-----------------------|-----------------------|
| Junior                | Mid-level             | Senior                |
| <input type="radio"/> | <input type="radio"/> | <input type="radio"/> |

Race/Ethnicity

|                                       |                       |
|---------------------------------------|-----------------------|
| Asian/Asian British                   | <input type="radio"/> |
| Black/African/Caribbean/Black British | <input type="radio"/> |
| Mixed/Multiple ethnic groups          | <input type="radio"/> |
| White                                 | <input type="radio"/> |
| Other                                 | <input type="radio"/> |

If other, please specify
